# Supplementary material for: Nanomaterial-Enhanced Sizings: Design and Optimisation of a Pilot-Scale Fibre Sizing Line
Source: MDPI journal article supplement (doi:10.3390/fib12020016), 2024-02-04
Supplement: s1 [file s1]

Archive with 1 entries (1 files):
- fibers-2811232-supplementary.pdf
